# Supplementary material for: A comparative study of carbon–platinum hybrid nanostructure architecture for amperometric biosensing
Source: Royal Society of Chemistry journal article supplement (doi:10.1039/c3an01718d), 2013-12-05
Supplement: c3an01718d.pdf [file c3an01718d.pdf]

Supplementary information for  
**A comparative study of carbon-platinum hybrid nanostructure architecture for  
amperometric biosensing**

D.C. Vanegas, M. Taguchi, P. Chaturvedi, S. Burrs, M. Tan, H. Yamaguchi, E.S. McLamore\*

\*To whom correspondence should be addressed. E-mail: [emclamor@ufl.edu](mailto:emclamor@ufl.edu); Tel: +1 352 392 1864

**This file includes:**

Supplemental Figures 1-4

Supplemental Tables 1-3

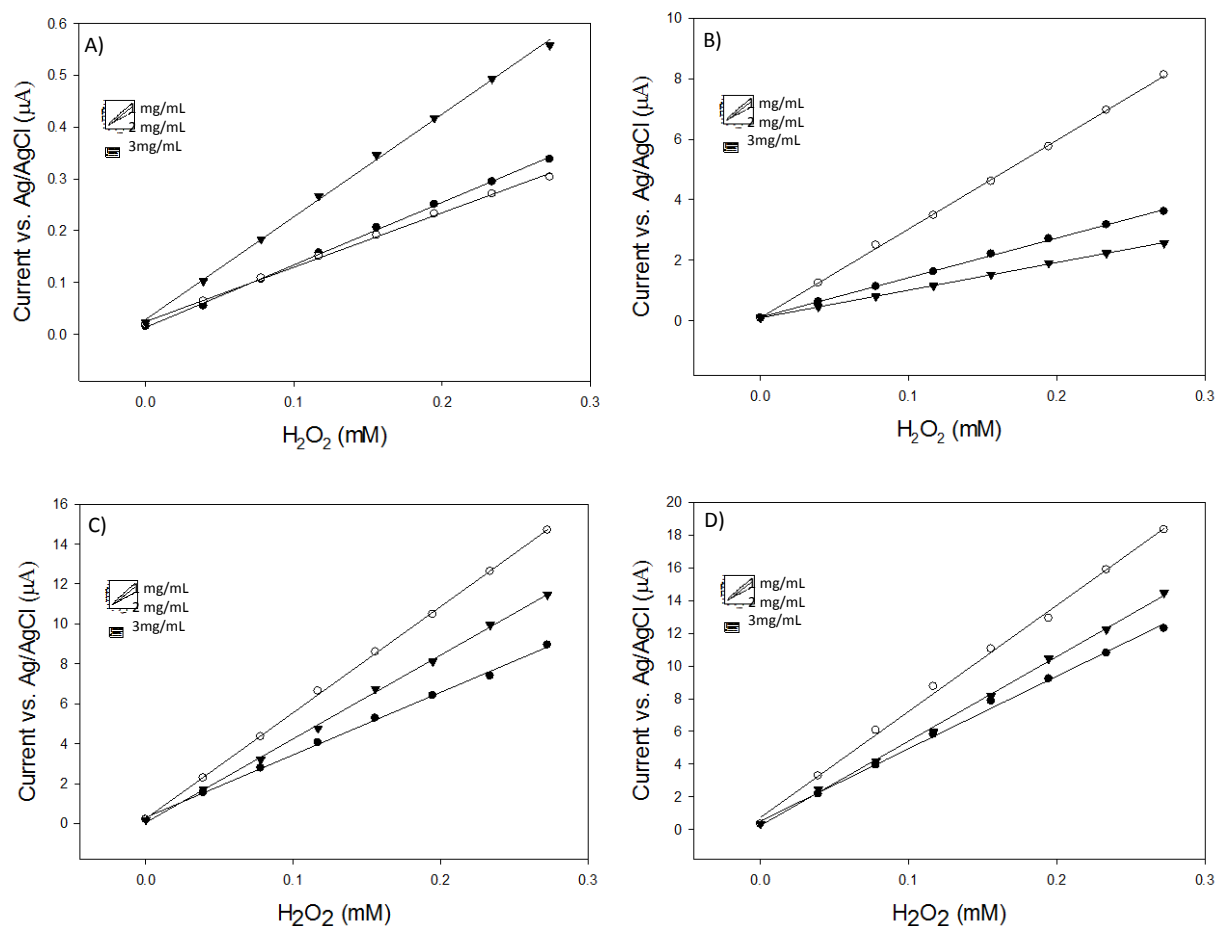

**Supplemental Figure 1.** Representative calibration curves of the CNT-based nanomaterial platforms. Each curve corresponds to one replicate in every treatment of the experimental design.

A) Representative calibration curves of the Pt/Ir-MWCNT platforms at 3 different carbon concentrations. B) Representative calibration curves of the Pt/Ir-nPt-MWCNT platforms at 3 different carbon concentrations. C) Representative calibration curves of the Pt/Ir-MWCNT-nPt platforms at 3 different carbon concentrations. D) Representative calibration curves of the Pt/Ir-nPt-MWCNT-nPt platforms at 3 different carbon concentrations.

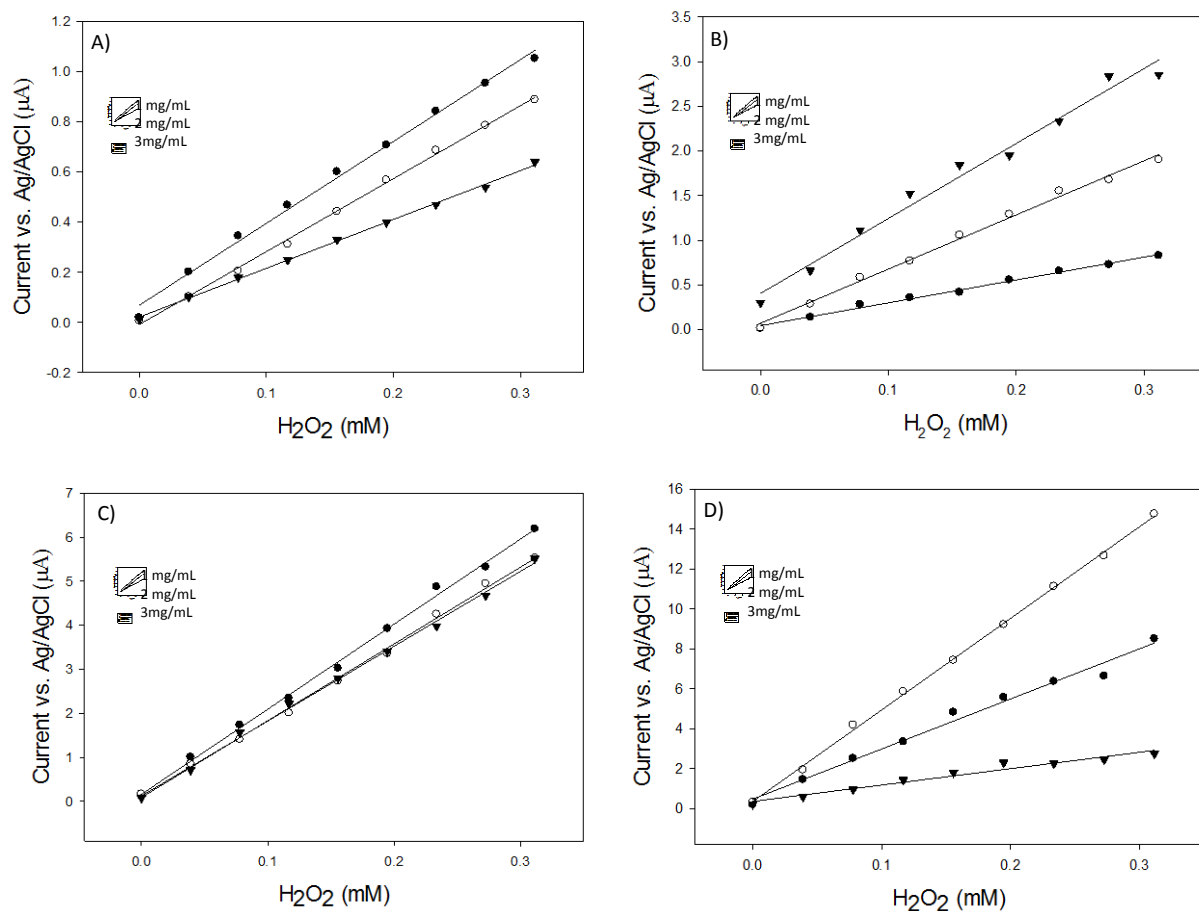

**Supplemental Figure 2.** Representative calibration curves of the GO-based nanomaterial platforms. Each curve corresponds to one replicate in every treatment of the experimental design.

A) Representative calibration curves of the Pt/Ir-GO platforms at 3 different carbon concentrations. B) Representative calibration curves of the Pt/Ir-nPt-GO platforms at 3 different carbon concentrations. C) Representative calibration curves of the Pt/Ir-RGO-nPt platforms at 3 different carbon concentrations. D) Representative calibration curves of the Pt/Ir-nPt-RGO-nPt platforms at 3 different carbon concentrations.

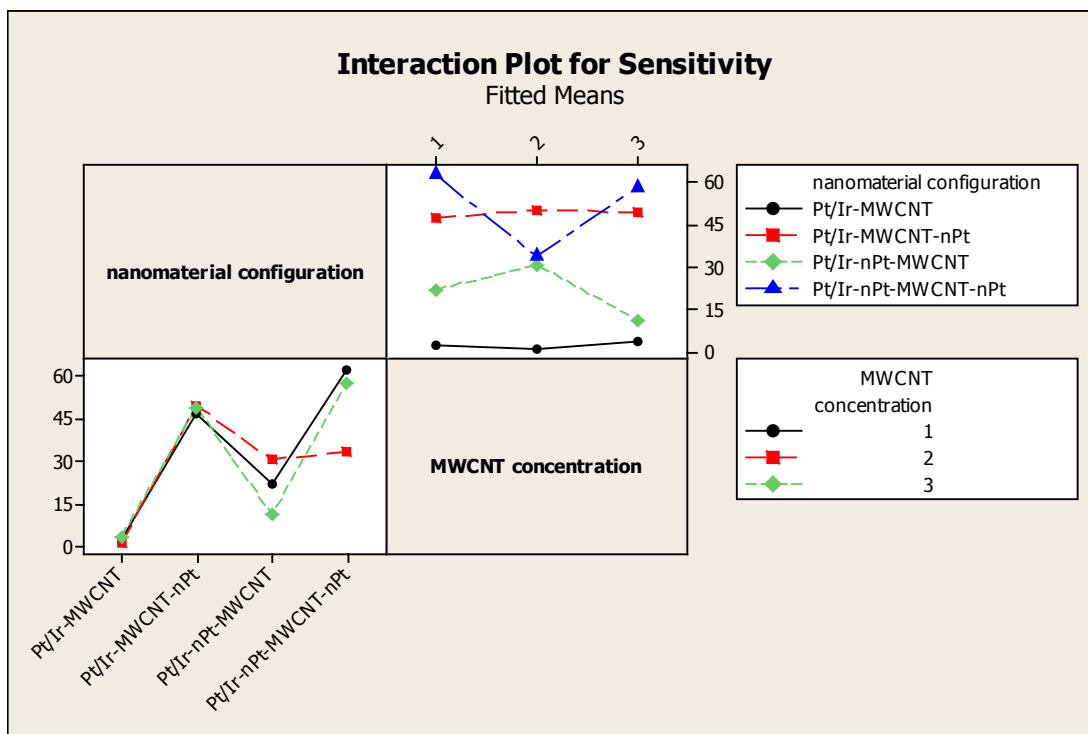

**Supplemental Figure 3.** Interaction plot showing non-combined effect of both factors (configuration/cnt concentration) on the electrochemical sensitivity of the MWCNT-modified electrodes.

**Supplemental table 1.** Anova general linear model for MWCNT-based nanomaterial platforms.

| Factor                     | Type  | Levels | Values                                                             |
|----------------------------|-------|--------|--------------------------------------------------------------------|
| nanomaterial configuration | fixed | 4      | Pt/Ir-MWCNT, Pt/Ir-MWCNT-nPt, Pt/Ir-nPt-MWCNT, Pt/Ir-nPt-MWCNT-nPt |
| MWCNT concentration        | fixed | 3      | 1, 2, 3                                                            |

  

| Analysis of Variance for Sensitivity, using Adjusted SS for Tests |    |         |         |        |       |       |
|-------------------------------------------------------------------|----|---------|---------|--------|-------|-------|
| Source                                                            | DF | Seq SS  | Adj SS  | Adj MS | F     | P     |
| nanomaterial configuration                                        | 3  | 14933.5 | 14933.5 | 4977.8 | 22.84 | 0.000 |
| MWCNT concentration                                               | 2  | 132.2   | 132.2   | 66.1   | 0.30  | 0.741 |
| nanomaterial configuration*<br>MWCNT concentration                | 6  | 1896.3  | 1896.3  | 316.0  | 1.45  | 0.237 |
| Error                                                             | 24 | 5231.7  | 5231.7  | 218.0  |       |       |
| Total                                                             | 35 | 22193.7 |         |        |       |       |

S = 14.7644    R-Sq = 76.43%    R-Sq(adj) = 65.62%

\*Normal distribution, independence, and homogeneity of variances were checked through residual plots and Levene's test.

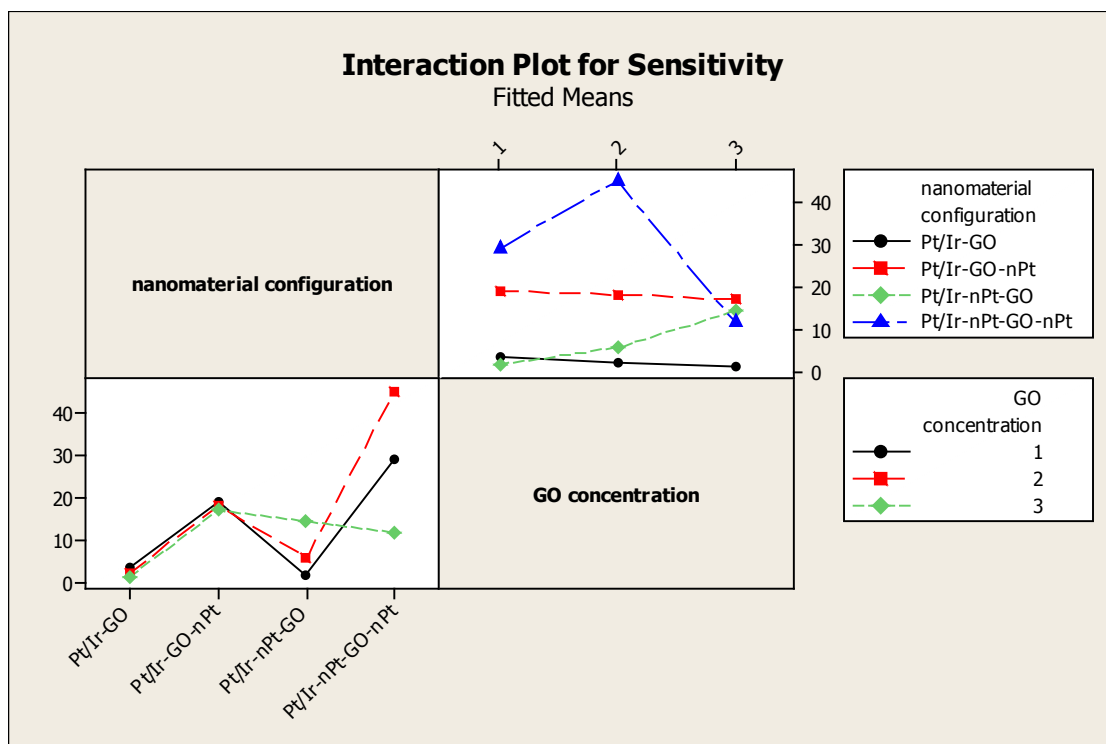

**Supplemental Figure 4.** Interaction plot showing the combined effect of both factors (configuration/GO concentration) on the electrochemical sensitivity of the GO-modified electrodes.

**Supplemental table 2.** Anova general linear model for GO-based nanomaterial platforms.

| Factor                     | Type  | Levels | Values                                                 |
|----------------------------|-------|--------|--------------------------------------------------------|
| nanomaterial configuration | fixed | 4      | Pt/Ir-GO, Pt/Ir-GO-nPt, Pt/Ir-nPt-GO, Pt/Ir-nPt-GO-nPt |
| GO concentration           | fixed | 3      | 1, 2, 3                                                |

Analysis of Variance for Sensitivity, using Adjusted SS for Tests

| Source                                          | DF | Seq SS  | Adj SS  | Adj MS  | F     | P     |
|-------------------------------------------------|----|---------|---------|---------|-------|-------|
| nanomaterial configuration                      | 3  | 3763.18 | 3763.18 | 1254.39 | 96.34 | 0.000 |
| GO concentration                                | 2  | 277.47  | 277.47  | 138.74  | 10.65 | 0.000 |
| nanomaterial configuration*<br>GO concentration | 6  | 1664.47 | 1664.47 | 277.41  | 21.31 | 0.000 |
| Error                                           | 24 | 312.50  | 312.50  | 13.02   |       |       |
| Total                                           | 35 | 6017.63 |         |         |       |       |

S = 3.60844    R-Sq = 94.81%    R-Sq(adj) = 92.43%

\*Normal distribution, independence, and homogeneity of variances were checked through residual plots and Levene's test.

### Supplemental table 3. Tukey test for GO-based nanomaterial platforms.

| Grouping Information Using Tukey Method and 95.0% Confidence        |                     |                  |          |                  |
|---------------------------------------------------------------------|---------------------|------------------|----------|------------------|
| nanomaterial configuration                                          |                     |                  |          |                  |
|                                                                     | N                   | Mean             | Grouping |                  |
| Pt/Ir-nPt-GO-nPt                                                    | 9                   | 28.856           | A        |                  |
| Pt/Ir-GO-nPt                                                        | 9                   | 18.333           | B        |                  |
| Pt/Ir-nPt-GO                                                        | 9                   | 7.400            | C        |                  |
| Pt/Ir-GO                                                            | 9                   | 2.367            | D        |                  |
| Means that do not share a letter are significantly different.       |                     |                  |          |                  |
| Tukey Simultaneous Tests                                            |                     |                  |          |                  |
| Response Variable Sensitivity                                       |                     |                  |          |                  |
| All Pairwise Comparisons among Levels of nanomaterial configuration |                     |                  |          |                  |
| nanomaterial configuration = Pt/Ir-GO subtracted from:              |                     |                  |          |                  |
| nanomaterial configuration                                          | Difference of Means | SE of Difference | T-Value  | Adjusted P-Value |
| Pt/Ir-GO-nPt                                                        | 15.967              | 1.701            | 9.386    | 0.0000           |
| Pt/Ir-nPt-GO                                                        | 5.033               | 1.701            | 2.959    | 0.0323           |
| Pt/Ir-nPt-GO-nPt                                                    | 26.489              | 1.701            | 15.572   | 0.0000           |
| nanomaterial configuration = Pt/Ir-GO-nPt subtracted from:          |                     |                  |          |                  |
| nanomaterial configuration                                          | Difference of Means | SE of Difference | T-Value  | Adjusted P-Value |
| Pt/Ir-nPt-GO                                                        | -10.93              | 1.701            | -6.427   | 0.0000           |
| Pt/Ir-nPt-GO-nPt                                                    | 10.52               | 1.701            | 6.186    | 0.0000           |
| nanomaterial configuration = Pt/Ir-nPt-GO subtracted from:          |                     |                  |          |                  |
| nanomaterial configuration                                          | Difference of Means | SE of Difference | T-Value  | Adjusted P-Value |
| Pt/Ir-nPt-GO-nPt                                                    | 21.46               | 1.701            | 12.61    | 0.0000           |
| Grouping Information Using Tukey Method and 95.0% Confidence        |                     |                  |          |                  |
| GO concentration                                                    |                     |                  |          |                  |
|                                                                     | N                   | Mean             | Grouping |                  |
| 2                                                                   | 12                  | 17.925           | A        |                  |
| 1                                                                   | 12                  | 13.567           | B        |                  |
| 3                                                                   | 12                  | 11.225           | B        |                  |
| Means that do not share a letter are significantly different.       |                     |                  |          |                  |
| Tukey Simultaneous Tests                                            |                     |                  |          |                  |
| Response Variable Sensitivity                                       |                     |                  |          |                  |
| All Pairwise Comparisons among Levels of GO concentration           |                     |                  |          |                  |
| GO concentration = 1 subtracted from:                               |                     |                  |          |                  |
| GO concentration                                                    | Difference of Means | SE of Difference | T-Value  | Adjusted P-Value |
| 2                                                                   | 4.358               | 1.473            | 2.959    | 0.0181           |
| 3                                                                   | -2.342              | 1.473            | -1.590   | 0.2694           |
| GO concentration = 2 subtracted from:                               |                     |                  |          |                  |
| GO concentration                                                    | Difference of Means | SE of Difference | T-Value  | Adjusted P-Value |
| 3                                                                   | -6.700              | 1.473            | -4.548   | 0.0004           |
